# Supplementary material for: Maslinic Acid, a Natural Triterpene, Induces a Death Receptor-Mediated Apoptotic Mechanism in Caco-2 p53-Deficient Colon Adenocarcinoma Cells
Source: PLOS journal article supplement (doi:10.1371/journal.pone.0146178), 2016-01-11
Supplement: S1 (10.1371/journal.pone.0146178.s001) [file journal.pone.0146178.s001]

**(A) Bid: Caco-2**

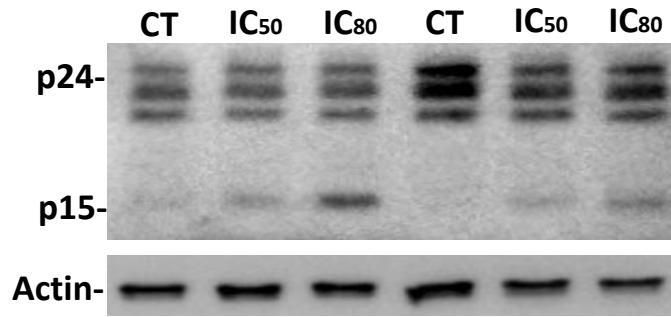

**Bid: HT29**

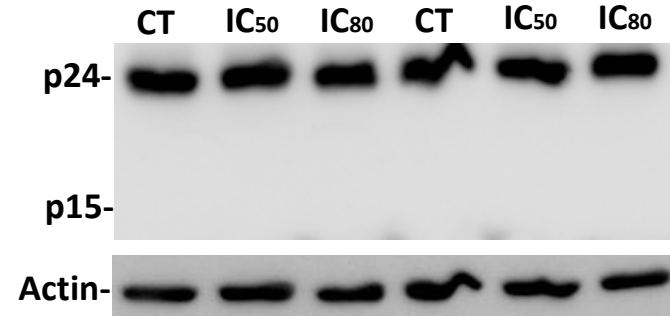

**(B) Bax: Caco-2**

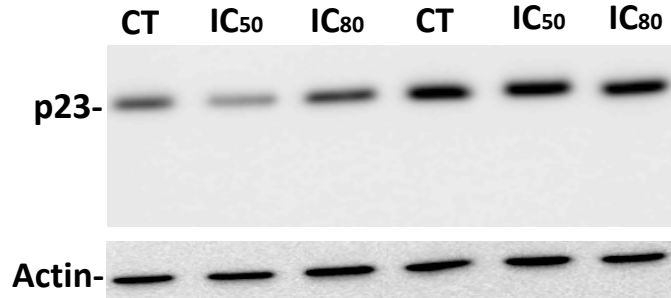

**Bax: HT29**

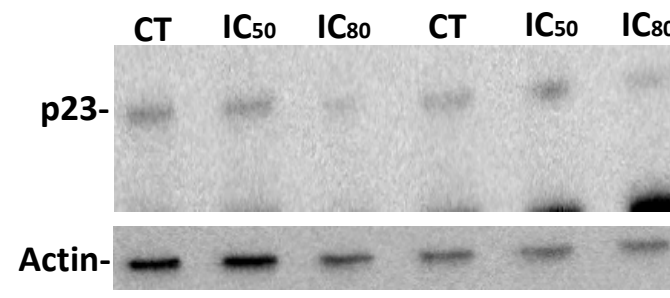

**S1 Figure. Supplementary figure 1. (A) Left:** Western blotting of the levels of Bid (p24) and t-Bid (p15) in Caco-2 cells. **Right:** Western blotting of the levels of Bid (p24) in HT29 cells. Note that not levels of t-Bid (p15) were detected in this cell line. Cells were treated with maslinic acid (MA) at IC<sub>50</sub> and IC<sub>80</sub> concentrations for 4h. **(B) Left:** Western blotting of levels of Bax (p23) in Caco-2 cells. Note that not changes in Bax levels were observed in this cell line. **Right:** Western blotting of levels of Bax (p23) in HT29 cells. Cells were treated with maslinic acid (MA) at IC<sub>50</sub> and IC<sub>80</sub> concentrations for 4h.
